# Supplementary material
Source: publisher site journal article supplement (https://www.dovepress.com/article/259338)
Supplement: Supplementary file 1 [file get_supplementary_file.php]

# Supplementary material

## Search strategies

Searches were constructed from medical subject headings (MeSH; MEDLINE®) and EMTREE® (EMBASE®) index terms. The initial search strategy was constructed for MEDLINE® and later adapted for EMBASE. Searches utilized keyword equivalents for index terms to identify relevant, newly published, and/or non-indexed literature in both databases. Searches were run in each online database on July 9, 2018.

**Table 1 Search strings for the systematic review of the economic/humanistic BOI in BD**

| **Concept** | **PubMed  (MeSH and keyword terms)** | **EMBASE  (EMTREE and keyword terms)** |
| --- | --- | --- |
| **#1 Bipolar Disorder**  ***(linked by OR)*** | - "Bipolar and Related Disorders"[Mesh] - "bipolar"[tiab] AND ("disorder"[tiab] OR "disorders"[tiab]) - “bipolar”[tiab] AND ("mania"[tiab] OR "manic"[tiab] OR "hypomanic"[tiab] OR "hypo-manic"[tiab] OR "hypo manic"[tiab] OR "hypomania"[tiab] OR "hypo-mania"[tiab] OR "hypo mania"[tiab]) | - 'bipolar disorder'/exp - 'bipolar':ti,ab NEAR/3 ('disorder':ti,ab OR 'disorders':ti,ab) - ‘bipolar’:ti,ab AND ('mania':ti,ab OR 'manic':ti,ab OR 'hypomanic':ti,ab OR 'hypo-manic':ti,ab OR 'hypo manic':ti,ab OR 'hypomania':ti,ab OR 'hypo-mania':ti,ab OR 'hypo mania':ti,ab) |
| **#2 Costs / Economics / Humanistic Burden**  ***(linked by OR)*** | - "Costs and Cost Analysis"[Mesh] - ("medical"[tiab] OR "hospital"[tiab] OR "emergency"[tiab]) AND ("cost"[tiab] OR "costs"[tiab]) - "Absenteeism"[Mesh] OR "Presenteeism"[Mesh] - "work productivity"[tiab] OR "workplace productivity"[tiab] OR "lost productivity"[tiab] OR "productivity loss"[tiab] OR "absenteeism"[tiab] OR "presenteeism"[tiab] - "economic burden"[tiab] OR "humanistic burden"[tiab] OR “societal burden”[tiab] OR “caregiver burden”[tiab] - "Quality of Life"[Mesh] OR "quality of life"[tiab] | - 'health economics'/de OR 'economic evaluation'/exp OR  'health care cost'/exp OR 'pharmacoeconomics'/exp - ((medical OR hospital OR emergency) NEAR/1 costs):ti,ab OR ((medical OR hospital OR emergency) NEAR/1 cost):ti,ab - 'absenteeism'/de OR 'presenteeism'/de OR 'productivity'/de - 'work productivity':ti,ab OR 'workplace productivity':ti,ab OR 'lost productivity':ti,ab OR 'productivity loss':ti,ab OR 'absenteeism':ti,ab OR 'presenteeism':ti,ab - 'economic burden':ti,ab OR 'humanistic burden':ti,ab OR 'societal burden':ti,ab OR 'caregiver burden':ti,ab - 'quality of life'/exp OR 'quality of life':ti,ab |
| **#3 Limits** | Medline[sb] OR inprocess[sb] OR pubstatusaheadofprint | -- |
| **#4 Language** | English | English |
| **#5 Date range** | 2008 to present | 2008 to present |
| **Search String** | #1 AND #2 AND #3 AND #4 AND #5 | #1 AND #2 AND #4 AND #5 |
| **TOTAL** | **991 records** | **3043 records** |

**Notes:** Search executed on July 9, 2018.

**Abbreviations:** de=index term; exp=explode index term; Mesh=medical subject heading; NEAR/x=proximity operator to find terms which are within 'n' words of each other (before or after); sb=subset; tiab/ti,ab=title/abstract.

Due to the small number of results in the NHS EED, a general search for economic evaluations in BD was run and the results screened for relevance to the research questions outlined in this protocol as a cross check.

**Table 2 NHS EED search for economic evaluations in bipolar disorder**

| **#** | **Search string** | **# Economic Evaluation Citations** |
| --- | --- | --- |
| 1 | bipolar | 81 |
| 2 | disorder* or illness* or diseas* or episod* or psychosis or syndrome | 9081 |
| 3 | mania or manic or hypomanic or hypo manic or hypo-manic or hypomania or hypo mania or hypo-mania | 28 |
| 4 | bipolar 1 | 57 |
| 5 | #1 AND (#2 OR #3) | 72 |
| String | #4 OR #5 | 77 |

**Notes:** *truncation/wildcard symbol. Search executed on July 9, 2018 without date limits.

## Included studies

**Table 3 Studies included in the systematic literature review for the economic burden of BD and BD-I**

| **Study** | **Data for BD‑I Reported?** | **Study Period  (Pricing Year, USD)** | **Diagnostic Criteria for BD** | **Data Source(s)** | **Sample Size  (BD or BD-I only)** |
| --- | --- | --- | --- | --- | --- |
| Bagalman, *et al* 2010 1 | No | 2001-2004 (2005) | ICD-9-CM 296.0x to 296.82; 296.89; 301.13 | Commercial claims | 1,258 (BD) |
| Bagalman, *et al* 2011 2 | Yes | 2004-2007 (2007) | ICD-9 CM 296.0, 296.4-296.7 | Commercial claims | 19,191 (BD-I) |
| Baldessarini, *et al* 2008 3 | No | 2001-2005 (NA) | ICD-9-CM 296.4-296.66, 296.7, 296.80, 296.81-296.82 296.89 | Commercial claims | 7,406 (BD) |
| Bradford, *et al* 2008 4 | No | 1994-1995 (NA) | Self-report | 1994-1995 National Health Interview Survey (NHIS) and its disability component (NHIS‑D) | 511 (BD) |
| Brooks, *et al* 2011 5 | Yes | 1999-2005 (NA) | DSM-IV criteria | Systematic Treatment Enhancement Program for Bipolar Disorder (STEP-BD) | 1,958 (BD) |
| Busch, *et al* 2013 6 | No | 1999-2002 (NR) | ICD-9 CM 296.0-296.1; 296.4-296.8; 301.11; 301.13 | Federal Employees Health Benefits (FEHB) database and commercial claims | 1,177 (BD) |
| Centorrino, *et al* 2009 7 | No | 2004-2005 (NR) | ICD-9 CM 296.0; 296.1; 296.4; 296.5; 296.6; 296.7; 296.80; 296.89; 296.81; 296.82; 301.13 | Commercial claims | 28,531 (BD) |
| Chatterton, *et al* 2008 8 | No | 1998-2002 (NR) | ICD-9 CM 296.4x-296.8x | Commercial claims | 43,448 (families containing a member with BD) |
| Chessick, *et al* 2009 9 | No | 2002-2003 (NA) | As defined by Systematic Treatment Enhancement Program for Bipolar Disorder (STEP-BD) trial | STEP-BD study | 500 (BD)  500 (caregivers to persons with BD) |
| Cloutier, *et al* 2018 10 | Yes | 2010-2015 (2015) | ICD-9/ICD-10 CM: 296.0x, 296.4x-7x/F31.0, F31.11-13, F31.2, F31.31, F31.32, F31.4, F31.5, F31.73-76, F31.9. | Various | 202,019 (BD-I) |
| Correll, *et al* 2017 11 | No | 2010-2012 (2014) | ICD-9 CM 296.0, 296.1, 296.4 to 296.8, 301.11 or 301.13 coded during hospital stays | Commercial claims | 124,803 (BD) |
| Darling, *et al* 2008 12 | No | Period NR (NA) | NR | Non-probability sample of clients receiving services from two specialist clinicians | 100 (BD) |
| Dilsaver 2011 13 | No | 2009 (2009) | NR | Various, key assumptions from Wyatt and Henter (1995) | - |
| Durden, *et al* 2010 14 | Yes | 2004-2006 (2007) | ICD-9 CM 296.0; 296.4-296.7 | Medicaid claims | 5,527 (BD-I) |
| Fiedorowicz, *et al* 2009 15 | No | Recruitment 1978-1981 (NA) | Intake Research Diagnostic Criteria diagnosis for BD-I or BD-II | National Institutes of Mental Health (NIMH) Collaborative Depression Study | 435 (BD) |
| Fiedorowicz, *et al* 2009 16 | Yes | Recruitment 1978-1981 (NA) | Intake Research Diagnostic Criteria diagnosis for BD-I or BD-II | National Institutes of Mental Health (NIMH) Collaborative Depression Study | 288 (BD‑I) |
| Gadermann, *et al* 2012 17 | No | 2001-2003 (NA) | World Health Organization (WHO) Composite International Diagnostic Interview, using DSM-IV criteria. | US National Comorbidity Survey Replication (NCS‑R) | NA – household sample of US adults |
| Gianfrancesco, *et al* 2008 18 | No | 1999-2004 (NR) | ICD-9 CM 296.4 to 296.8 or 296.0 and 296.1 | Commercial claims | 12,952 (BD), 8,092 analyzed |
| Goldberg, *et al* 2009 19 | No | 1999-2005 (NR) | DSM-IV criteria | Systematic Treatment Enhancement Program for Bipolar Disorder (STEP-BD) study | 4,035 (BD) |
| Gruber, *et al* 2009 20 | No | Period NR (NA) | DSM-IV criteria | Systematic Treatment Enhancement Program for Bipolar Disorder (STEP-BD) study and patient interview | 2,024 (BD) |
| Guo, *et al* 2008 21 | No | 1998-2002 (2002) | ICD-9 CM 296.0, 296.1 or 296.4-296.8 | Commercial claims | 67,862 (BD) |
| Haskins, *et al* 2010 22 | No | 1999-2005 (2008) | DSM-IV diagnosis for BD‑I or BD‑II | Electronic medical records | 632 (BD) |
| Hassan and Lage 2009 23 | No | 2000-2006 (NA) | Inpatient discharge diagnosis of ICD-9 CM 296.4x to 296.8x | Commercial claims | 1,973 (BD) |
| Hooshmand, *et al* 2014 24 | Yes | 2000-2011 (NA) | As defined by Systematic Treatment Enhancement Program for Bipolar Disorder (STEP-BD) trial | Medical records from the Stanford University Bipolar Disorder Clinic | 597 (BD) |
| Jing, *et al* 2009 25 | No | 2003-2006 (2006) | ICD-9-CM 296.0x, 296.1, 296.4x, 6x-8x | Commercial claims | 6,162 (BD) |
| Kim, *et al* 2011 26 | No | 2003-2006 (NR) | ICD-9 CM 296.0, 296.1; 296.4x, 6x-8x | Commercial claims | 7,169 (BD) |
| Lage and Hassan 2009 27 | No | 2000-2006 (NA) | ICD-9-CM 296.4× to 296.8× | Commercial claims | 7,769 (BD) |
| Lang, *et al* 2011 28 | Yes | 2004-2006 (NR) | ICD-9 CM 296.0x, 296.1x, 296.4x-7x | Medicaid claims | 9,410 (BD-I) |
| Lindamer, *et al* 2012 29 | No | 2000-2004 (NA) | Investigators required a documented mental health diagnosis in the mental health services database | Database for San Diego County Adult and Older Adult Mental Health Services (AOAMHS) | 1,215 (BD) |
| Lum, *et al* 2013 30 | No | 2005 (2005) | Patients had an ICD-9 code associated with BD on one inpatient (hospital, long-term care, or Medicare skill nursing facility) or two outpatients or carrier claims for the year 2005 | Medicare and Medicaid claims | 4,796 (BD) |
| McMorris, *et al* 2010 31 | Yes | Jul-Nov 2006 (NA) | Psychiatrists' diagnosis | Electronic case report form; patient questionnaires administered online or via telephone | 219 (BD‑I) |
| Moreno, *et al* 2012 32 | Yes | 2001-2002 (NA) | National Institute on Alcohol Abuse and Alcoholism (NIAAA) Alcohol Use Disorder and Associated Disabilities Interview Schedule-DSM-IV version (AUDADIS-IV) | National Epidemiologic Survey on Alcohol and Related Conditions (NESARC) | 935 (BD-I) |
| O'Donnell, *et al* 2017 33 | No | 2010-2015 (NA) | DSM-IV | Patient interview; standardized questionnaires and tests administered in clinic or via mail | 273 (BD) |
| Pelletier, *et al* 2013 34 | No | 2007-2008 (2008) | ICD-9-CM 296.0x-296.8x | Commercial claims | 4,841 (BD) |
| Perlis, *et al* 2010 35 | No | 1999-2005 (NA) | DSM-IV | Systematic Treatment Enhancement Program for Bipolar Disorder (STEP-BD) study | 3,640 (BD) |
| Perron, *et al* 2009 36 | Yes | 2001-2002 (NA) | DSM-IV | National Epidemiologic Survey on Alcohol and Related Conditions (NESARC) | 1,548 (BD-I) |
| Peters, *et al* 2016 37 | Yes | 2004-2005 (NA) | DSM-IV | National Epidemiologic Survey on Alcohol and Related Conditions (NESARC), Wave 2 | 909 (BD-I) |
| Petrila, *et al* 2010 38 | Yes | 2002-2003; 2004-2006 (NR) | As recorded in Medicaid claims files | Multiple databases: Criminal Justice Information System, Pinellas County, Florida; Florida Medicaid claims database; Florida State Mental Health and Substance Abuse Authority; databases for county-specific Department of Health and Human Services, social services, homeless and emergency medical services | 1,111 (BD‑I) |
| Pilhatsch, *et al* 2018 39 | No | Period NR (NA) | Diagnosis made by the prescribing psychiatrist at a clinical interview, based on DSM‑IV or DSM‑5 criteria | Medical records | 241 (BD) |
| Qiu, *et al* 2009 40 | No | 2000-2005 (2004) | ICD-9 CM 296.4x-296.8x and misdiagnosed 296.2x, 296.3x, 311 | Medicaid claims | 838 (BD) |
| Qiu, *et al* 2010 41 | No | 2000-2005 (2004) | ICD-9 CM 296.0x; 296.1x; 296.4x-296.8x and misdiagnosed 296.2x, 296.3x, 311 | Medicaid claims | 3,328 (BD) |
| Rascati, *et al* 2011 42 | No | 2002-2008 (NR) | ICD-9 CM 296.0x, 296.1x, 296.4x, 296.6x or 296.81 | Medicaid claims | 2,446 (BD) |
| Robertson, *et al* 2015 43 | No | 2006-2007 (2007) | NR | Connecticut Department of Mental Health and Addiction Services and Medicaid claims | 212,898 (BD) |
| Rubio, *et al* 2014 44 | No | 2001-2002; 2004-2005 (NA) | DSM-IV | National Epidemiologic Survey on Alcohol and Related Conditions (NESARC) | 934 (BD) |
| Seabury, *et al* 2014 45 | No | 2001-2008 (2009) | ICD-9-CM 296.0x, 296.1x, and 296.4x-296.8x | Medicaid Analytic eXtract | 170,596 (BD) |
| Shippee, *et al* 2011 46 | No | 2004-2006 (NA) | ICD-9 CM 296.00-296.16 or 296.40-296.99 in any wave of the Medical Expenditure Panel Survey (MEPS) panel were classified as BD | Medical Expenditure Panel Survey (MEPS) | 572 (BD) |
| Simon, *et al* 2008 47 | No | 1999-2000  (NA) | DSM-IV diagnosis of BD‑I or BD‑II, confirmed by structured interview | Medical records from managed care organizations (5 mental health clinics of Group Health Cooperative in Washington state) | 441 (BD) |
| Soreca, *et al* 2008 48 | Yes | Period NR (NA) | DSM-IV | Bipolar Disorder Center for Pennsylvanians protocol study | 111 (BD-I) |
| Stensland, *et al* 2008 49 | No | 2002-2003 (NR) | ICD-9 CM 296.0x; 296.1x; 296.4x-8x | Commercial and Medicaid claims | 3,119 (BD) |
| Stensland, *et al* 2010 50 | No | 2002-2003 (NR) | NR | Commercial and Medicaid claims | 7,981 (BD) |
| Stensland, *et al* 2010 51 | No | 1999-2005 (NR) | ICD-9 CM 296.40 to 296.79, or 296.89 | Commercial claims | 15,454 (BD) |
| Stensland, *et al* 2012 52 | No | 2006 (2006) | ICD-9 CM 296.0x-296.1x and 296.4x-269.9 | Commercial claims | 50,827 (BD) |
| Tohen, *et al* 2017 53 | No | 2012-2014 (2013) | ICD-9 CM 296.0x-296.1x, 296.4x-296.81, 296.89 | Commercial claims | 3,329 (BD) |
| Weber, *et al* 2011 54 | No | 1979-2006 (NA) | ICD-9 CM 296.0; 296.1; 296.4-296.7, 296.80 and 296.89 | Centers for Disease Control 1979-2006 multiyear National Hospital Discharge Survey (NHDS) data | 27,054 (BD) |
| Williams, *et al* 2011 55 | No | 2004-2007 (NR) | Clinical diagnosis of BD per the criteria of the National Committee on Quality Assurance's Healthcare Effectiveness Data and Information Set | Commercial claims | 122 (BD) |
| Young, *et al* 2015 56 | No | 2010 (NA) | ICD-9 CM 296.0x to 296.1x; 296.4x; 301.11; 301.13 | Kaiser Permanente of Northern California | 14,943 (BD) |

**Abbreviations:** BD, bipolar disorder; BD-I, bipolar I disorder; BD-II, bipolar II disorder; DSM 5, Diagnostic and Statistical Manual of Mental Disorders, Fifth Edition; DSM IV, Diagnostic and Statistical Manual of Mental Disorders, Fourth Edition; ICD-10 CM, International Classification of Diseases, Tenth Revision, Clinical Modification; ICD-9 CM, International Classification of Diseases, Ninth Revision, Clinical Modification; NA, not applicable; NR, not reported; USD, US dollars.

## Methodologic characteristics

An assessment of methodologic characteristics was performed for the studies identified from this review that reported cost data (Table 4). The results from these assessments are summarized in Table 5.

**Table 4 Description of Methodological Characteristics**

| Criterion | Description |
| --- | --- |
| *Aims and methods of the study* | |
| Study objective | The objectives and research questions of the study were described clearly. |
| Inclusion and exclusion | The objective diagnostic criteria (e.g., DSM-IV) used to identify eligible patients were reported. The study population was specified. |
| Non-diseased comparison group or BD-related costs | The study included a non-diseased control group in order to calculate excess costs or, if no control group was involved, the costs were due to the diseases of interest (e.g., by diagnostic codes). |
| Matching or regression analysis | If comparison groups were used: (a) they were matched, at least in terms of age and/or gender, to allow a direct comparison between equally dispersed groups or (b) regression analysis was carried out in order to control for differences. |
| Sensitivity analyses | Relevant parameters were varied in univariate and/or probabilistic sensitivity analyses in order to address parameter uncertainties (e.g., different unit costs). |
| *Calculation of costs* | |
| Data source | The source of information on health care utilization or costs was specifically reported. |
| Perspective | The perspective of the cost calculation was reported (e.g., payer, employer, societal, community, patient) or could be inferred. |
| Cost calculation | The method of cost calculation was clearly documented. |
| Cost categories | The study estimated costs from the utilization of different kinds of health care services or areas. More than one cost category was given in order to consider, at best, all costs that accrued from the disease under study. |
| Measurement units | Relevant costs and consequences were measured accurately in appropriate physical units (e.g., count of physician visits; lost work-days; gained-life years). |
| Reference year (pricing year) | All costs were valued at the price level of a stated base year. |
| Currency | The currency in which the costs were calculated was reported. |
| Inflation and/or discount rate | If data were collected from or estimated for a period of longer than one year, costs were adjusted for differential timing and the inflation rate/discount rate was mentioned. |
| Monetary valuing of resource utilization | If data on resource utilization were collected that were valued with unit costs, the latter were reported. If cost data were used, these reflected actual charges. |
| *Presentation of results* | |
| Sample size | The sample size was reported. |
| Demographics | The characteristics of the sample were described; at least (mean) age and gender were reported. |
| Arithmetic mean costs | The cost estimates were presented as arithmetic means. |
| Standard deviations | Standard deviations of cost estimates were reported as a measure of variability. |
| Separate information of used number of services and costs | Separate information about the number of services (e.g., health care) and costs were given for all cost categories that were described. |
| *Discussion* | |
| Discussion with respect to other studies | The results were discussed in relation to other studies on the same topic. |
| Limitations | The limitations regarding the calculation of costs and the representativeness of the study population were discussed. |

Derived from Drummond MF et al (2007)57; and Center for Reviews and Dissemination (2009)58

**Table 5 Methodological Characteristics of Studies Reporting Costs**

|  | **METHODS AND AIMS** | | | | | **CALCULATION OF COSTS** | | | | | | | | | **PRESENTATION OF RESULTS** | | | | | **DISCUSSION** | |
| --- | --- | --- | --- | --- | --- | --- | --- | --- | --- | --- | --- | --- | --- | --- | --- | --- | --- | --- | --- | --- | --- |
| **Author, Year** | **Study objective** | **Inclusion and exclusion** | **Non-BD comparison group or BD-related costs** | **Matching or regression analysis** | **Sensitivity analyses** | **Data source** | **Perspective** | **Cost calculation** | **Cost categories** | **Measurement units** | **Reference year  (pricing year)** | **Currency** | **Inflation and/or  discount rate** | **Monetary valuing of resource utilization** | **Sample size** | **Demographics** | **Arithmetic mean costs** | **Standard deviations** | **Separate information of used # of services / costs** | **Discussion with respect to other studies** | **Limitations** |
| Bagalman, *et al* 2010 1 | ● | ● | ● | ● |  | ● | ● | ● | ● | ● | ● | ● |  | ● | ● | ● | ● | ● | ● | ● | ● |
| Bagalman, *et al* 2011 2 | ● | ● | ● | ● |  | ● | ● | ● | ● | ● | ● | ● | ● |  | ● | ● | ● | ● | ● | ● | ● |
| Busch, *et al* 2013 6 | ● | ● | ● | ● |  | ● | ● | ● | ● | ● | ● | ● |  | ● |  | ● | ● | ● | ● | ● | ● |
| Centorrino, *et al* 2009 7 | ● | ● | ● |  |  | ● | ● | ● | ● |  | ● | ● |  |  | ● | ● | ● | ● | ● | ● | ● |
| Chatterton, *et al* 2008 8 | ● | ● | ● | ● |  | ● | ● | ● | ● | ● |  | ● |  | ● | ● | ● | ● | ● | ● | ● | ● |
| Cloutier, *et al* 2018 10 | ● | ● | ● | ● | ● | ● | ● | ● | ● | ● | ● | ● | ● | ● | ● | ● | ● |  |  | ● | ● |
| Correll, *et al* 2017 11 | ● | ● | ● | ● | ● | ● | ● | ● | ● | ● | ● | ● |  | ● | ● | ● | ● | ● | ● | ● | ● |
| Dilsaver 2011 13 | ● |  |  | ● |  | ● | ● | ● |  |  | ● | ● | ● |  |  |  |  |  |  | ● | ● |
| Durden, *et al* 2010 14 | ● | ● | ● | ● |  | ● | ● | ● | ● | ● | ● | ● | ● |  | ● |  | ● |  |  | ● | ● |
| Gianfrancesco, *et al* 2008 18 | ● | ● |  | ● |  | ● | ● | ● | ● | ● |  | ● |  | ● | ● | ● |  | ● |  | ● | ● |
| Guo, *et al* 2008 21 | ● | ● | ● | ● |  | ● | ● | ● | ● | ● | ● | ● | ● |  | ● | ● | ● | ● | ● | ● | ● |
| Haskins, *et al* 2010 22 | ● | ● |  | ● |  | ● | ● | ● | ● | ● | ● | ● | ● | ● | ● | ● | ● | ● | ● | ● | ● |
| Jing, *et al* 2009 25 | ● | ● | ● | ● | ● | ● | ● | ● | ● |  | ● | ● |  |  | ● | ● | ● | ● |  | ● | ● |
| Kim, *et al* 2011 26 | ● | ● | ● | ● | ● | ● | ● | ● | ● | ● |  | ● |  | ● | ● | ● | ● | ● |  | ● | ● |
| Lang, *et al* 2011 28 | ● | ● | ● | ● |  | ● | ● | ● | ● |  |  |  |  | ● | ● | ● | ● | ● | ● | ● | ● |
| Lum, *et al* 2013 30 | ● | ● |  |  |  | ● | ● | ● | ● | ● | ● | ● |  | ● | ● | ● | ● | ● |  | ● | ● |
| Pelletier, *et al* 2013 34 | ● | ● | ● |  |  | ● | ● | ● | ● | ● | ● | ● | ● |  | ● | ● | ● | ● |  | ● | ● |
| Petrila, *et al* 2010 38 | ● | ● |  |  |  | ● | ● | ● |  | ● |  | ● |  |  | ● | ● | ● | ● |  |  | ● |
| Qiu, *et al* 2009 40 | ● | ● | ● | ● |  | ● | ● | ● |  | ● | ● | ● | ● | ● | ● | ● | ● | ● | ● | ● | ● |
| Qiu, *et al* 2010 41 | ● | ● | ● | ● |  | ● | ● | ● | ● | ● | ● | ● |  |  | ● | ● | ● | ● |  | ● | ● |
| Rascati, *et al* 2011 42 | ● | ● | ● | ● |  | ● | ● | ● | ● | ● |  | ● |  |  | ● | ● | ● | ● |  | ● | ● |
| Robertson, *et al* 2015 43 | ● | ● |  |  |  | ● | ● |  |  | ● | ● | ● |  |  |  |  | ● |  |  |  | ● |
| Seabury, *et al* 2014 45 | ● | ● | ● | ● |  | ● | ● |  | ● |  | ● | ● |  |  | ● | ● | ● | ● |  | ● | ● |
| Stensland, *et al* 2008 49 | ● | ● | ● | ● |  | ● | ● | ● | ● | ● | ● | ● |  | ● | ● | ● | ● | ● |  | ● | ● |
| Stensland, *et al* 2010 50 | ● | ● | ● | ● |  | ● | ● | ● | ● | ● | ● | ● |  | ● | ● | ● | ● | ● | ● | ● | ● |
| Stensland, *et al* 2010 51 | ● | ● | ● |  |  | ● | ● | ● |  | ● | ● | ● |  | ● | ● | ● | ● | ● | ● | ● | ● |
| Stensland, *et al* 2012 52 | ● | ● | ● |  |  | ● | ● | ● |  | ● | ● | ● |  |  | ● | ● | ● | ● |  | ● | ● |
| Tohen, *et al* 2017 53 | ● | ● | ● |  |  | ● | ● | ● | ● | ● | ● | ● | ● | ● | ● | ● | ● | ● | ● | ● | ● |
| Williams, *et al* 2011 55 | ● | ● |  | ● |  | ● | ● | ● | ● | ● |  | ● |  |  | ● | ● | ● | ● |  | ● | ● |
| Young, *et al* 2015 56 | ● | ● |  | ● |  | ● | ● |  |  | ● |  |  |  |  | ● | ● |  |  |  | ● | ● |

**Abbreviations:** BD=bipolar disorder

## Supplementary references

1. Bagalman E, Yu-Isenberg KS, Durden E, Crivera C, Dirani R, Bunn WB, 3rd. Indirect costs associated with nonadherence to treatment for bipolar disorder. *J Occup Environ Med.* 2010;52(5):478-485.

2. Bagalman E, Muser E, Choi JC, et al. Health care resource utilization and costs in a commercially insured population of patients with bipolar disorder type I and frequent psychiatric interventions. *Clin Ther.* 2011;33(10):1381-1390.e1384.

3. Baldessarini RJ, Perry R, Pike J. Factors associated with treatment nonadherence among US bipolar disorder patients. *Hum Psychopharmacol.* 2008;23(2):95-105.

4. Bradford DW, Kim MM, Braxton LE, Marx CE, Butterfield M, Elbogen EB. Access to medical care among persons with psychotic and major affective disorders. *Psychiatr Serv.* 2008;59(8):847-852.

5. Brooks JO, Goldberg JF, Ketter TA, et al. Safety and tolerability associated with second-generation antipsychotic polytherapy in bipolar disorder: findings from the Systematic Treatment Enhancement Program for Bipolar Disorder. *J Clin Psychiatry.* 2011;72(2):240-247.

6. Busch AB, Yoon F, Barry CL, et al. The effects of mental health parity on spending and utilization for bipolar, major depression, and adjustment disorders. *Am J Psychiatry.* 2013;170(2):180-187.

7. Centorrino F, Mark TL, Talamo A, Oh K, Chang J. Health and economic burden of metabolic comorbidity among individuals with bipolar disorder. *J Clin Psychopharmacol.* 2009;29(6):595-600.

8. Chatterton ML, Ke X, Lewis BE, Rajagopalan K, Lazarus A. Impact of bipolar disorder on the family: utilization and cost of health care resources. *P T.* 2008;33(1):15-34.

9. Chessick CA, Perlick DA, Miklowitz DJ, et al. Suicidal ideation and depressive symptoms among bipolar patients as predictors of the health and well-being of caregivers. *Bipolar Disord.* 2009;11(8):876-884.

10. Cloutier M, Greene M, Guerin A, Touya M, Wu E. The economic burden of bipolar I disorder in the United States in 2015. *J Affect Disord.* 2018;226:45-51.

11. Correll CU, Ng-Mak DS, Stafkey-Mailey D, Farrelly E, Rajagopalan K, Loebel A. Cardiometabolic comorbidities, readmission, and costs in schizophrenia and bipolar disorder: a real-world analysis. *Ann Gen Psychiatry.* 2017;16:9.

12. Darling CA, Olmstead SB, Lund VE, Fairclough JF. Bipolar disorder: medication adherence and life contentment. *Arch Psychiatr Nurs.* 2008;22(3):113-126.

13. Dilsaver SC. An estimate of the minimum economic burden of bipolar I and II disorders in the United States: 2009. *J Affect Disord.* 2011;129(1-3):79-83.

14. Durden E, Bagalman E, Muser E, et al. Characteristics, healthcare utilization and costs of bipolar disorder type I patients with and without frequent psychiatric intervention in a Medicaid population. *J Med Econ.* 2010;13(4):698-704.

15. Fiedorowicz JG, Solomon DA, Endicott J, et al. Manic/hypomanic symptom burden and cardiovascular mortality in bipolar disorder. *Psychosom Med.* 2009;71(6):598-606.

16. Fiedorowicz JG, Leon AC, Keller MB, Solomon DA, Rice JP, Coryell WH. Do risk factors for suicidal behavior differ by affective disorder polarity? *Psychol Med.* 2009;39(5):763-771.

17. Gadermann AM, Alonso J, Vilagut G, Zaslavsky AM, Kessler RC. Comorbidity and disease burden in the National Comorbidity Survey Replication (NCS-R). *Depress Anxiety.* 2012;29(9):797-806.

18. Gianfrancesco FD, Sajatovic M, Rajagopalan K, Wang RH. Antipsychotic treatment adherence and associated mental health care use among individuals with bipolar disorder. *Clin Ther.* 2008;30(7):1358-1374.

19. Goldberg JF, Brooks JO, 3rd, Kurita K, et al. Depressive illness burden associated with complex polypharmacy in patients with bipolar disorder: findings from the STEP-BD. *J Clin Psychiatry.* 2009;70(2):155-162.

20. Gruber J, Harvey AG, Wang PW, et al. Sleep functioning in relation to mood, function, and quality of life at entry to the Systematic Treatment Enhancement Program for Bipolar Disorder (STEP-BD). *J Affect Disord.* 2009;114(1-3):41-49.

21. Guo JJ, Keck PE, Jr., Li H, Jang R, Kelton CM. Treatment costs and health care utilization for patients with bipolar disorder in a large managed care population. *Value Health.* 2008;11(3):416-423.

22. Haskins JT, Macfadden W, Turner N, et al. Clinical characteristics and resource utilization of patients with bipolar disorder who have frequent psychiatric interventions. *J Med Econ.* 2010;13(3):552-558.

23. Hassan M, Lage MJ. Risk of rehospitalization among bipolar disorder patients who are nonadherent to antipsychotic therapy after hospital discharge. *Am J Health Syst Pharm.* 2009;66(4):358-365.

24. Hooshmand F, Miller S, Dore J, et al. Trends in pharmacotherapy in patients referred to a bipolar specialty clinic, 2000-2011. *J Affect Disord.* 2014;155:283-287.

25. Jing Y, Kim E, You M, Pikalov A, Tran QV. Healthcare costs associated with treatment of bipolar disorder using a mood stabilizer plus adjunctive aripiprazole, quetiapine, risperidone, olanzapine or ziprasidone. *J Med Econ.* 2009;12(2):104-113.

26. Kim E, You M, Pikalov A, Van-Tran Q, Jing Y. One-year risk of psychiatric hospitalization and associated treatment costs in bipolar disorder treated with atypical antipsychotics: a retrospective claims database analysis. *BMC Psychiatry.* 2011;11:6.

27. Lage MJ, Hassan MK. The relationship between antipsychotic medication adherence and patient outcomes among individuals diagnosed with bipolar disorder: a retrospective study. *Ann Gen Psychiatry.* 2009;8:7.

28. Lang K, Korn J, Muser E, Choi JC, Abouzaid S, Menzin J. Predictors of medication nonadherence and hospitalization in Medicaid patients with bipolar I disorder given long-acting or oral antipsychotics. *J Med Econ.* 2011;14(2):217-226.

29. Lindamer LA, Liu L, Sommerfeld DH, et al. Predisposing, enabling, and need factors associated with high service use in a public mental health system. *Adm Policy Ment Health.* 2012;39(3):200-209.

30. Lum TY, Parashuram S, Shippee TP, et al. Diagnosed prevalence and health care expenditures of mental health disorders among dual eligible older people. *Gerontologist.* 2013;53(2):334-344.

31. McMorris BJ, Downs KE, Panish JM, Dirani R. Workplace productivity, employment issues, and resource utilization in patients with bipolar I disorder. *J Med Econ.* 2010;13(1):23-32.

32. Moreno C, Hasin DS, Arango C, et al. Depression in bipolar disorder versus major depressive disorder: results from the National Epidemiologic Survey on Alcohol and Related Conditions. *Bipolar Disord.* 2012;14(3):271-282.

33. O'Donnell LA, Deldin PJ, Grogan-Kaylor A, et al. Depression and executive functioning deficits predict poor occupational functioning in a large longitudinal sample with bipolar disorder. *J Affect Disord.* 2017;215:135-142.

34. Pelletier E, Hassan M, Alemayehu B, Smith D, Kim J. Bipolar disorder healthcare costs for quetiapine extended-release versus aripiprazole. *Am J Pharm Benefits.* 2013;5(3):e73-e79.

35. Perlis RH, Ostacher MJ, Miklowitz DJ, et al. Clinical features associated with poor pharmacologic adherence in bipolar disorder: results from the STEP-BD study. *J Clin Psychiatry.* 2010;71(3):296-303.

36. Perron BE, Howard MO, Nienhuis JK, Bauer MS, Woodward AT, Kilbourne AM. Prevalence and burden of general medical conditions among adults with bipolar I disorder: results from the National Epidemiologic Survey on Alcohol and Related Conditions. *J Clin Psychiatry.* 2009;70(10):1407-1415.

37. Peters AT, West AE, Eisner L, Baek J, Deckersbach T. The Burden of repeated mood episodes in bipolar I disorder: Results from the National Epidemiological Survey on Alcohol and Related Conditions. *J Nerv Ment Dis.* 2016;204(2):87-94.

38. Petrila J, Andel R, Constantine R, Robst J. Public expenditures related to the criminal justice system and to services for arrestees with a serious mental illness. *Psychiatr Serv.* 2010;61(5):516-519.

39. Pilhatsch M, Glenn T, Rasgon N, et al. Regularity of self-reported daily dosage of mood stabilizers and antipsychotics in patients with bipolar disorder. *Int J Bipolar Disord.* 2018;6(1):10.

40. Qiu Y, Christensen DB, Fu AZ, Liu GG. Cost analysis in a Medicaid program for patients with bipolar disorder who initiated atypical antipsychotic monotherapy. *Curr Med Res Opin.* 2009;25(2):351-361.

41. Qiu Y, Fu AZ, Liu GG, Christensen DB. Healthcare costs of atypical antipsychotic use for patients with bipolar disorder in a Medicaid programme. *Appl Health Econ Health Policy.* 2010;8(3):167-177.

42. Rascati KL, Richards KM, Ott CA, et al. Adherence, persistence of use, and costs associated with second-generation antipsychotics for bipolar disorder. *Psychiatr Serv.* 2011;62(9):1032-1040.

43. Robertson AG, Swanson JW, Lin H, Easter MM, Frisman LK, Swartz MS. Influence of criminal justice involvement and psychiatric diagnoses on treatment costs among adults with serious mental illness. *Psychiatr Serv.* 2015;66(9):907-909.

44. Rubio JM, Olfson M, Perez-Fuentes G, Garcia-Toro M, Wang S, Blanco C. Effect of first episode axis I disorders on quality of life. *J Nerv Ment Dis.* 2014;202(4):271-274.

45. Seabury SA, Goldman DP, Kalsekar I, Sheehan JJ, Laubmeier K, Lakdawalla DN. Formulary restrictions on atypical antipsychotics: impact on costs for patients with schizophrenia and bipolar disorder in Medicaid. *Am J Manag Care.* 2014;20(2):e52-60.

46. Shippee ND, Shah ND, Williams MD, Moriarty JP, Frye MA, Ziegenfuss JY. Differences in demographic composition and in work, social, and functional limitations among the populations with unipolar depression and bipolar disorder: results from a nationally representative sample. *Health Qual Life Outcomes.* 2011;9:90.

47. Simon GE, Ludman EJ, Unutzer J, Operskalski BH, Bauer MS. Severity of mood symptoms and work productivity in people treated for bipolar disorder. *Bipolar Disord.* 2008;10(6):718-725.

48. Soreca I, Fagiolini A, Frank E, Houck PR, Thompson WK, Kupfer DJ. Relationship of general medical burden, duration of illness and age in patients with bipolar I disorder. *J Psychiatr Res.* 2008;42(11):956-961.

49. Stensland MD, Schultz JF, Frytak JR. Diagnosis of unipolar depression following initial identification of bipolar disorder: a common and costly misdiagnosis. *J Clin Psychiatry.* 2008;69(5):749-758.

50. Stensland MD, Schultz JF, Frytak JR. Depression diagnoses following the identification of bipolar disorder: costly incongruent diagnoses. *BMC Psychiatry.* 2010;10:39.

51. Stensland MD, Zhu B, Ascher-Svanum H, Ball DE. Costs associated with attempted suicide among individuals with bipolar disorder. *J Ment Health Policy Econ.* 2010;13(2):87-92.

52. Stensland M, Watson PR, Grazier KL. An examination of costs, charges, and payments for inpatient psychiatric treatment in community hospitals. *Psychiatr Serv.* 2012;63(7):666-671.

53. Tohen M, Ng-Mak D, Rajagopalan K, Halpern R, Chuang CC, Loebel A. Patient characteristics associated with use of lurasidone versus other atypical antipsychotics in patients with bipolar disorder: Analysis from a claims database in the United States. *Prim Care Companion CNS Disord.* 2017;19(3).

54. Weber NS, Fisher JA, Cowan DN, Niebuhr DW. Psychiatric and general medical conditions comorbid with bipolar disorder in the National Hospital Discharge Survey. *Psychiatr Serv.* 2011;62(10):1152-1158.

55. Williams MD, Shah ND, Wagie AE, Wood DL, Frye MA. Direct costs of bipolar disorder versus other chronic conditions: an employer-based health plan analysis. *Psychiatr Serv.* 2011;62(9):1073-1078.

56. Young JQ, Kline-Simon AH, Mordecai DJ, Weisner C. Prevalence of behavioral health disorders and associated chronic disease burden in a commercially insured health system: findings of a case-control study. *Gen Hosp Psychiatry.* 2015;37(2):101-108.

57. Drummond MF, Sculpher MJ, Torrance GW, O’Brien BJ, Stoddart GL. *Methods for the Economic Evaluation of Health Care Programs*. 3rd ed. Oxford, UK: Oxford University Press; 2007.

58. Centre for Reviews and Dissemination - University of York. *Systematic Reviews. CRD’s Guidance for Undertaking Reviews in Health Care*. 3rd ed. York, UK: CRD, University of York; 2009.
